# Supplementary material for: Nature of β-1,3-Glucan-Exposing Features on Candida albicans Cell Wall and Their Modulation
Source: PubMed Central journal article supplement (PMC9765427; doi:10.1128/mbio.02605-22), 2022-10-11

a

## Growth after 5 h

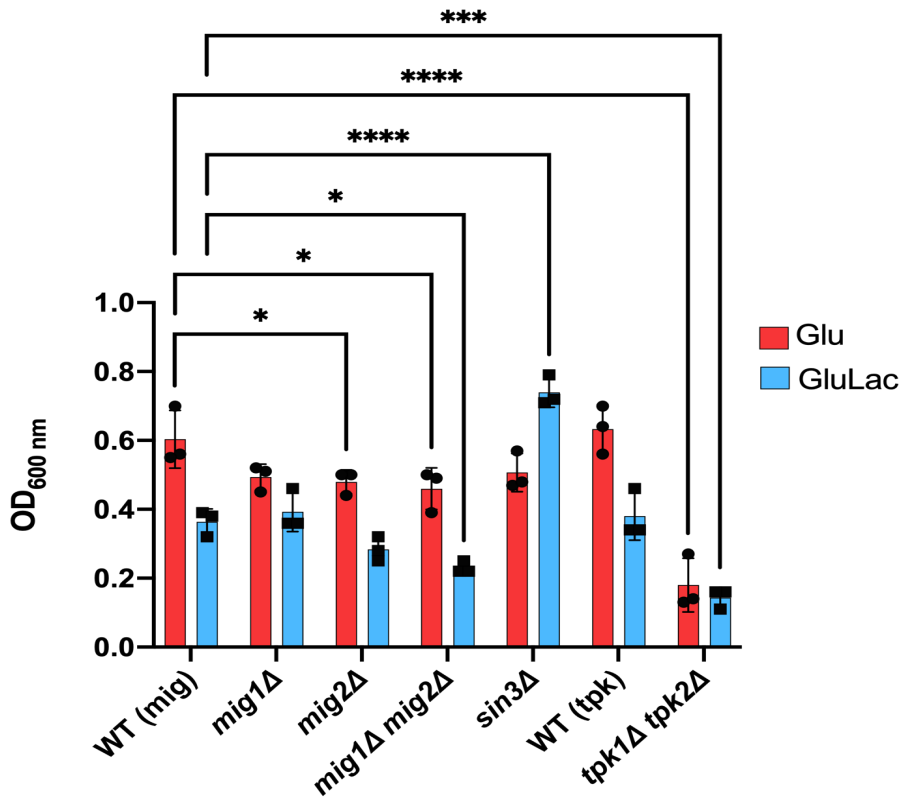

b

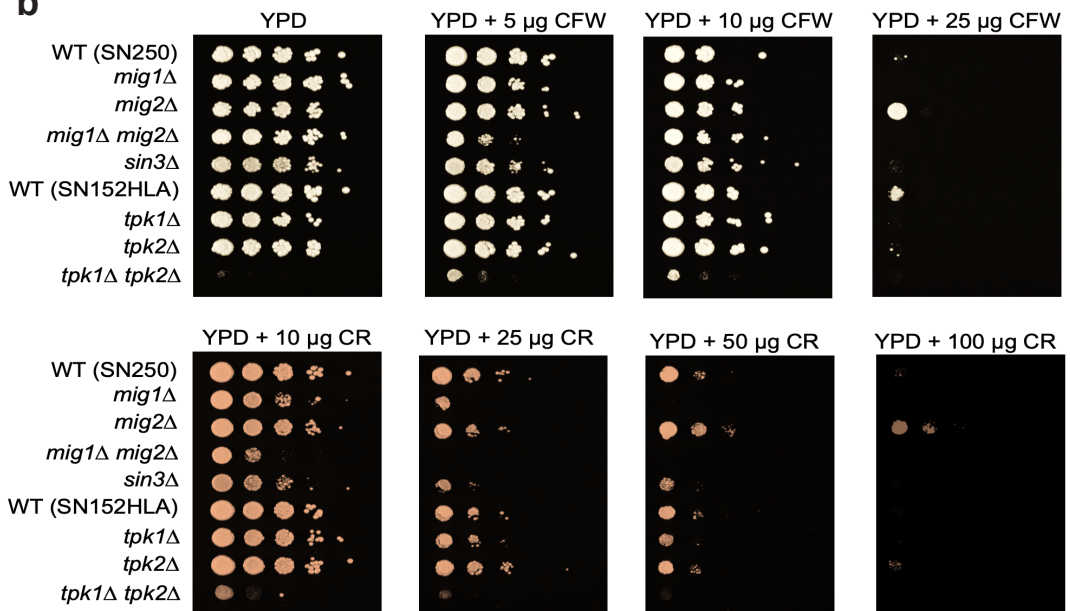

Supplement: mbio.02605-22-s0007.pdf [file mbio.02605-22-s0007.pdf]
