# Supplementary material for: Nature of β-1,3-Glucan-Exposing Features on Candida albicans Cell Wall and Their Modulation
Source: PubMed Central journal article supplement (PMC9765427; doi:10.1128/mbio.02605-22), 2022-10-11
Supplement: mbio.02605-22-s0010.pdf [file mbio.02605-22-s0010.pdf]

**Table S3. Primers used for RT-qPCR**

| <i>Target</i>      | <i>F primer</i>          | <i>R primer</i>         | <i>Reference</i> |
|--------------------|--------------------------|-------------------------|------------------|
| Human IFN- $\beta$ | CAGCAATTTTCAGTGT CAGAAGC | TCATCCTGTCCTTGAGGCAGT   | (1)              |
| Human ISG15        | GCGAGATCACCCAGAAGATT     | GCCCTTGTTATTCTCACCA     | (2)              |
| Human IFIT1        | GCGCTGGGTATGCGATCTC      | CAGCCTGCCTTAGGGGAAG     | (3)              |
| KSHV ORF37         | TGACACCCTTGGGTAAACAGT    | TCTCGAACCTTGCGTGCTTTAGA | (4)              |

**References**

1. Jacobs SR, Gregory SM, West JA, Wollish AC, Bennett CL, Blackbourn DJ, Heise MT, Damania B. 2013. The Viral Interferon Regulatory Factors of Kaposi's Sarcoma-Associated Herpesvirus Differ in Their Inhibition of Interferon Activation Mediated by Toll-Like Receptor 3. *J Virol* 87:798–806.
2. Yoo Y-S, Park Y-Y, Kim J-H, Cho H, Kim S-H, Lee H-S, Kim T-H, Sun Kim Y, Lee Y, Kim C-J, Jung JU, Lee J-S, Cho H. 2015. The mitochondrial ubiquitin ligase MARCH5 resolves MAVS aggregates during antiviral signalling. *Nat Commun* 6:7910.
3. Gardinassi LG, Garcia GR, Costa CHN, Silva VC, Santos IKF de M. 2016. Blood Transcriptional Profiling Reveals Immunological Signatures of Distinct States of Infection of Humans with *Leishmania infantum*. *PLoS Negl Trop Dis* 10:e0005123.
4. Rossetto CC, Pari G. 2012. KSHV PAN RNA Associates with Demethylases UTX and JMJD3 to Activate Lytic Replication through a Physical Interaction with the Virus Genome. *PLOS Pathog* 8:e1002680.
